# Supplementary material for: Insights Into the Ecological Role of Pseudomonas spp. in an Ant-plant Symbiosis
Source: PubMed Central journal article supplement (PMC7882492; doi:10.3389/fmicb.2021.621274), 2021-02-01
Supplement: Presentation_1.pdf [file Presentation_1.pdf]

## SUPPLEMENTARY INFORMATION

### Insights into the ecological role of *Pseudomonas* spp. in an ant-plant symbiosis

Taise T. H. Fukuda<sup>1†</sup>; Camila F. Pereira<sup>1†</sup>; Weilan G. P. Melo<sup>1</sup>; Carla Menegatti<sup>1</sup>; Paulo H. M. Andrade<sup>2</sup>; Milton Groppo<sup>3</sup>; Paulo T. Lacava<sup>2</sup>; Cameron R. Currie<sup>4</sup>; Mônica T. Pupo<sup>1\*</sup>

<sup>†</sup>These authors contributed equally to this work.

<sup>1</sup>School of Pharmaceutical Sciences of Ribeirão Preto, University of São Paulo, Ribeirão Preto, SP, Brazil.

<sup>2</sup>Laboratory of Microbiology and Biomolecules, Department of Morphology and Pathology, Center of Biological Sciences and Health, Federal University of São Carlos, São Carlos, SP, Brazil

<sup>3</sup>Laboratory of Plant Systematics, Department of Biology, Faculty of Philosophy, Sciences and Letters at Ribeirão Preto, University of São Paulo, Ribeirão Preto, SP, Brazil

<sup>4</sup>Department of Bacteriology, University of Wisconsin-Madison, Madison, WI, USA.

#### Table of contents

**Figure S1.** Isolation of the phytopathogen *Pestalotiopsis clavisora* from *Cecropia* leaves

**Figure S2** - Heatmap of the biological activity of *Cecropia-Azteca* microbial strains against human pathogens, phytopathogens, and entomopathogens.

**Figure S3** - Antifungal activity of *Pseudomonas* sp. ICBG1870 against *Pestalotiopsis clavispora* FB1.

**Figure S4** - Phylogeny of 16S rRNA gene

**Figure S5** - Phylogeny of condensation domains.

**Figure S6** - Phylogeny of condensation domains.

**Figure S7** - Phylogeny of condensation domains.

**Figure S8** - Phylogeny of adenylation domains.

**Figure S9** - HRESI-MS spectrum of viscosinamide.

**Figure S10** - MALDI-MS/MS spectrum of viscosinamide.

**Figure S11** - <sup>1</sup>H NMR spectrum of viscosinamide (CD<sub>3</sub>COCD<sub>3</sub>, 500 MHz).

**Figure S12** - <sup>1</sup>H, <sup>1</sup>H-COSY spectrum of viscosinamide (CD<sub>3</sub>COCD<sub>3</sub>, 500 MHz).

**Figure S13** - gHSQC spectrum of viscosinamide (CD<sub>3</sub>COCD<sub>3</sub>, 500 MHz).

**Figure S14** - gHMBC spectrum of viscosinamide (CD<sub>3</sub>COCD<sub>3</sub>, 500 MHz).

**Table S1** - NMR spectroscopic data of viscosinamide (CD<sub>3</sub>COCD<sub>3</sub>).

**Figure S15** - Chromatograms of viscosinamide products after hydrolysis and advanced Marfey derivatization.

**Figure S16** - Chemical structures of viscosin, WLIP, viscosinamide A and massetolide A.

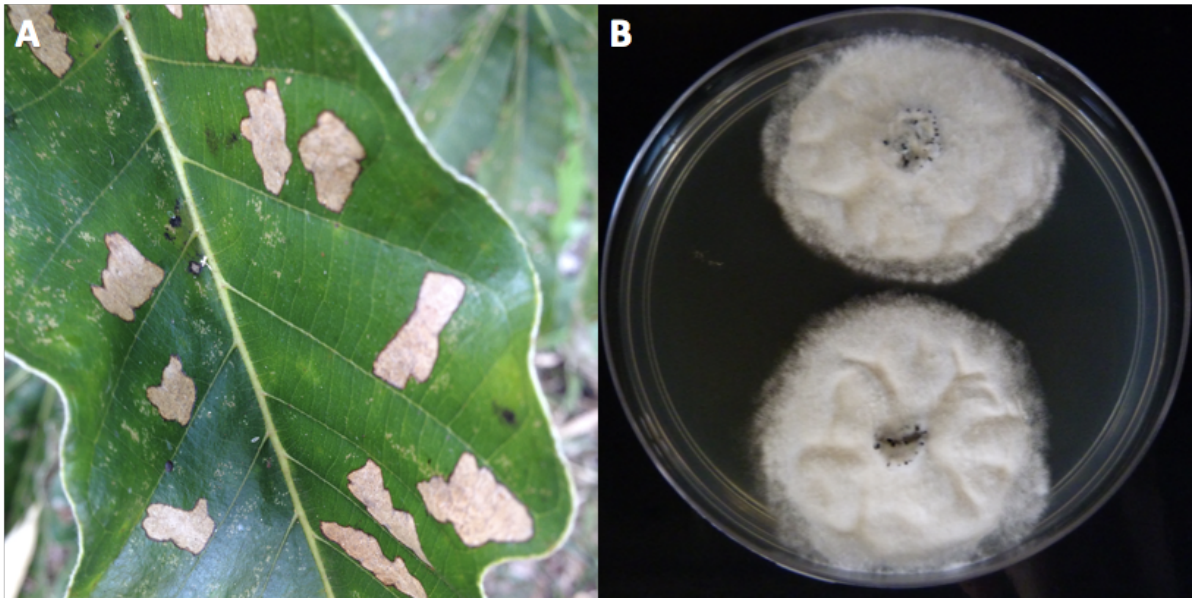

**Figure S1.** Isolation of the phytopathogen *Pestalotiopsis clavispora* from *Cecropia* leaves. **(A)** *Cecropia* sp. leaf contaminated with a fungal pathogen. **(B)** *P. clavispora* FB1 isolated from *Cecropia* sp.

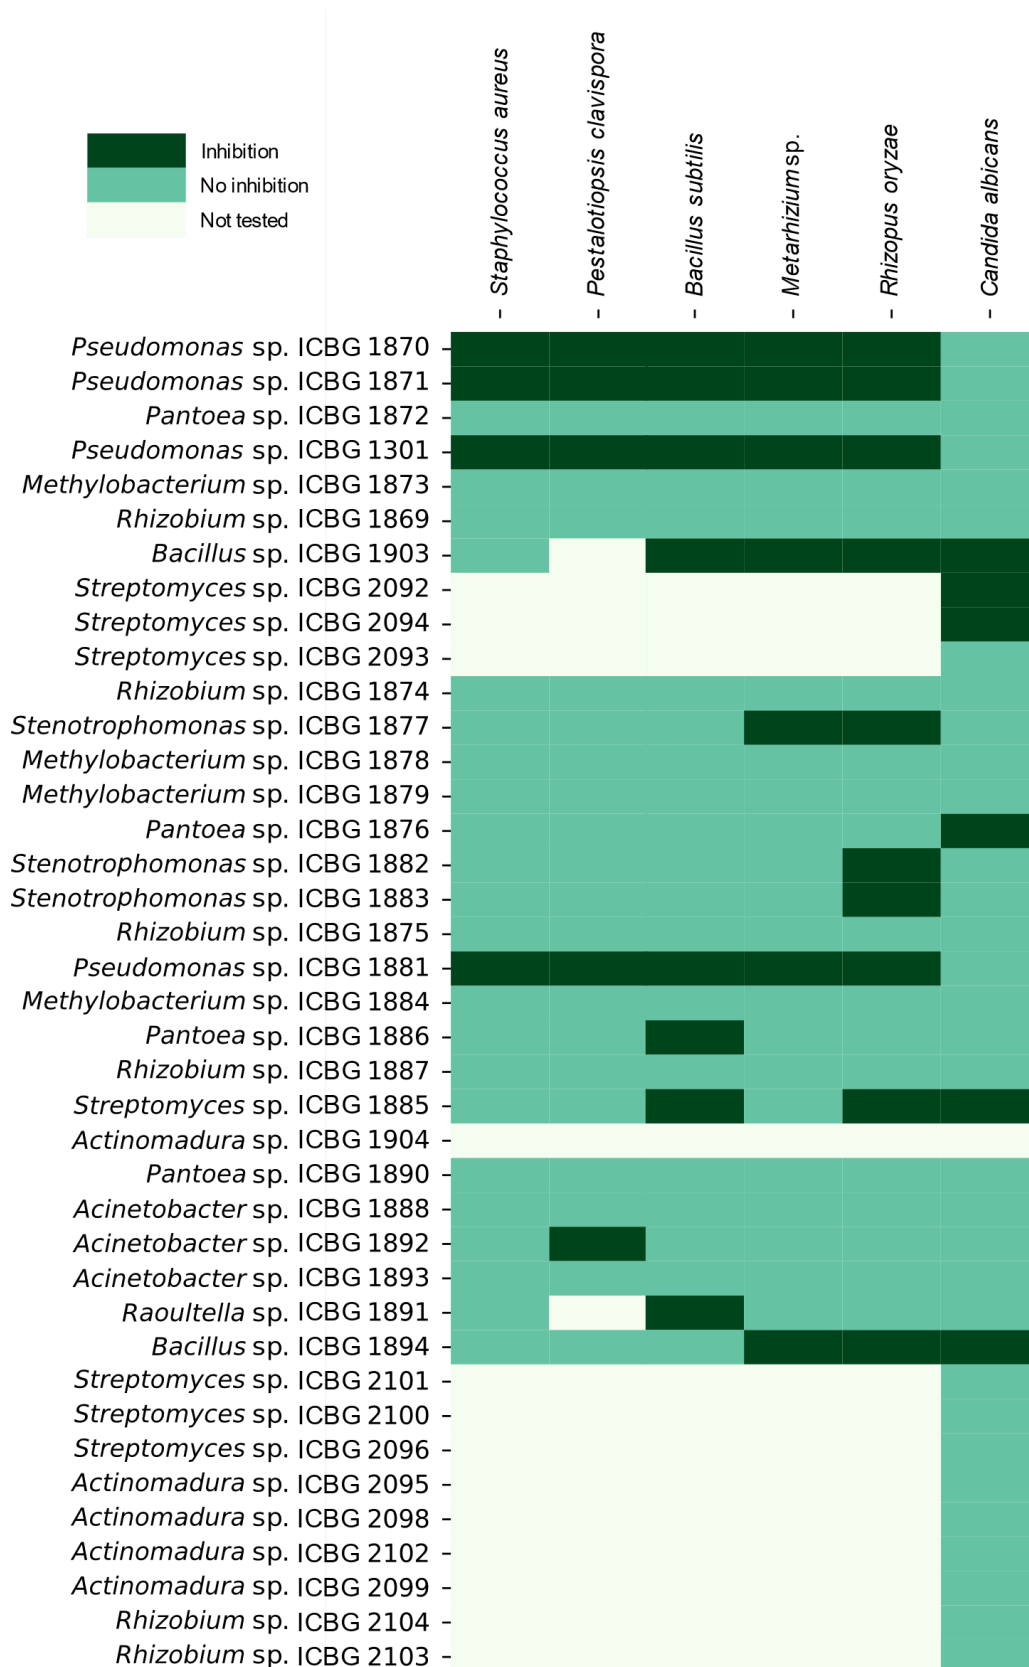

**Figure S2.** Heatmap of the biological activity of *Cecropia-Azteca* microbial strains against human pathogens, phytopathogens and an entomopathogen.

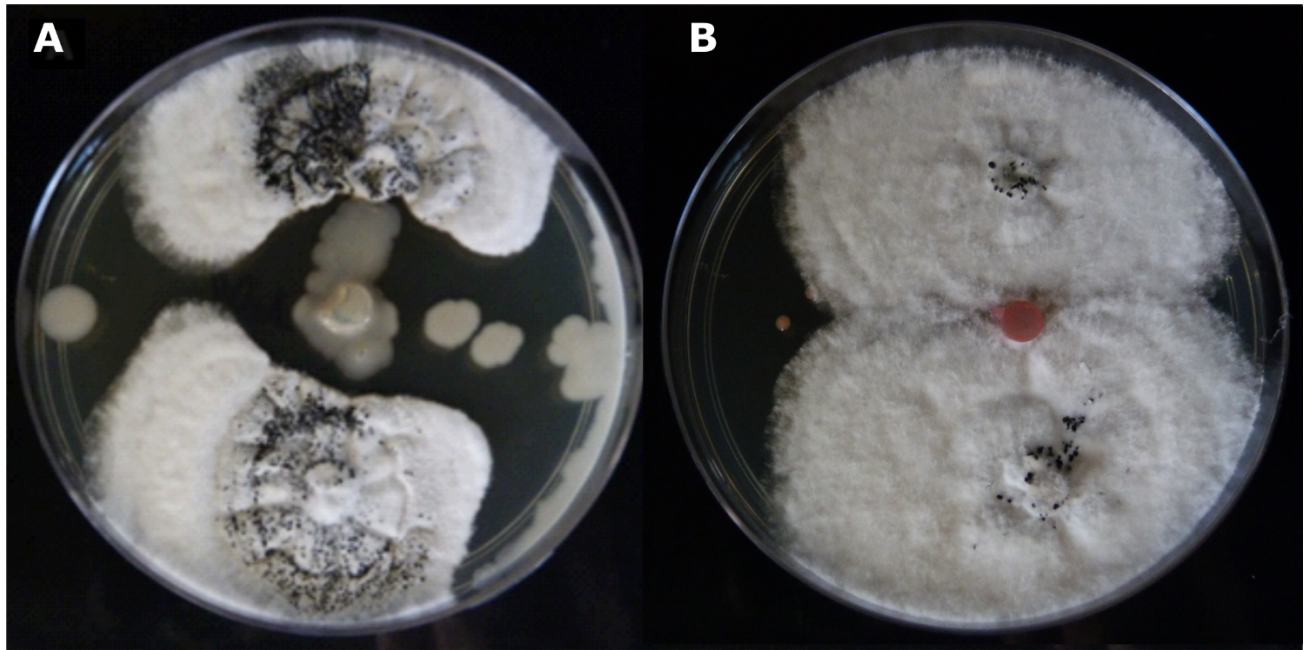

**Figure S3.** Antifungal activity of *Pseudomonas* sp. ICBG1870 against *Pestalotiopsis clavispora* FB1. **(A)** Inhibition zone of *Pseudomonas* sp. ICBG1870 against *P. clavispora*. **(B)** *Methylobacterium* sp. ICBG1884 against *P. clavispora*, negative control.

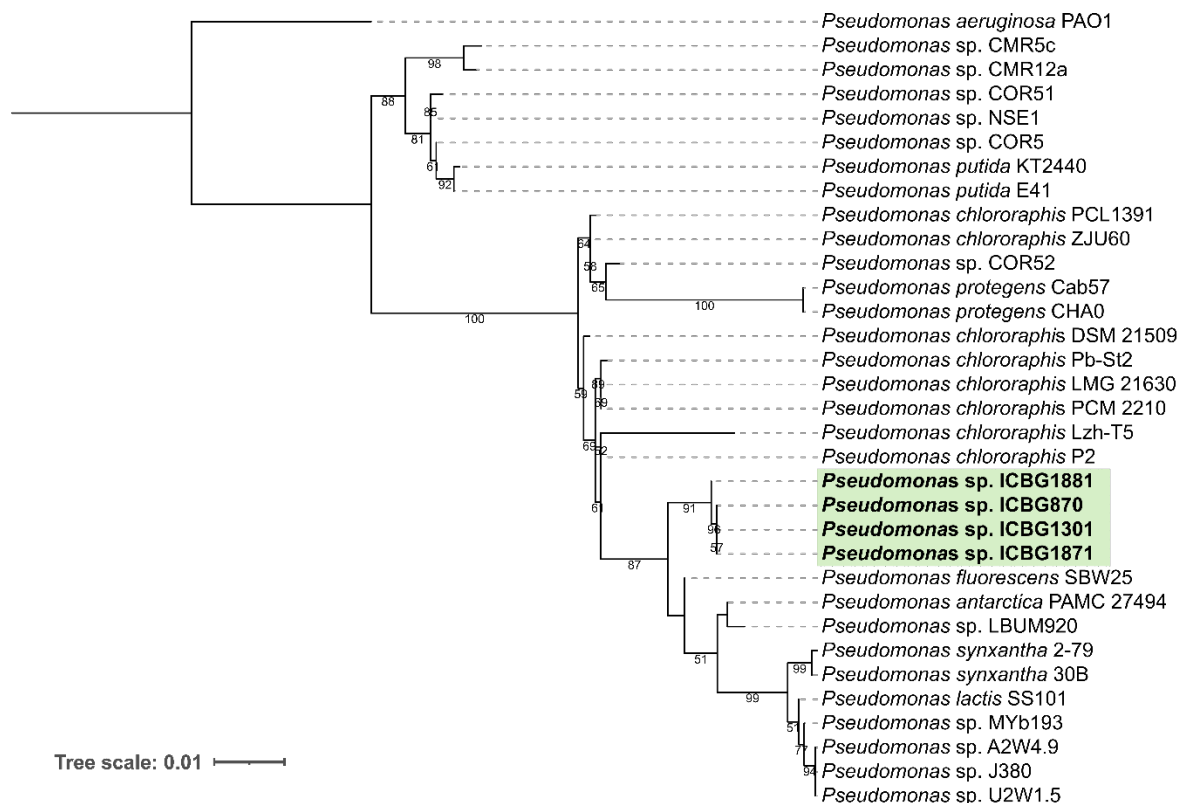

**Figure S4.** Phylogenetic analysis based on the 16S rRNA gene of viscosin-producers. The bootstrap support values are based on 1000 bootstrap replicates. The phylogeny was reconstructed using IQ-TREE, using the TPM3+F+R2 model of nucleotide substitution and including *P. aeruginosa* PAO1 as outgroup.

Tree scale: 1

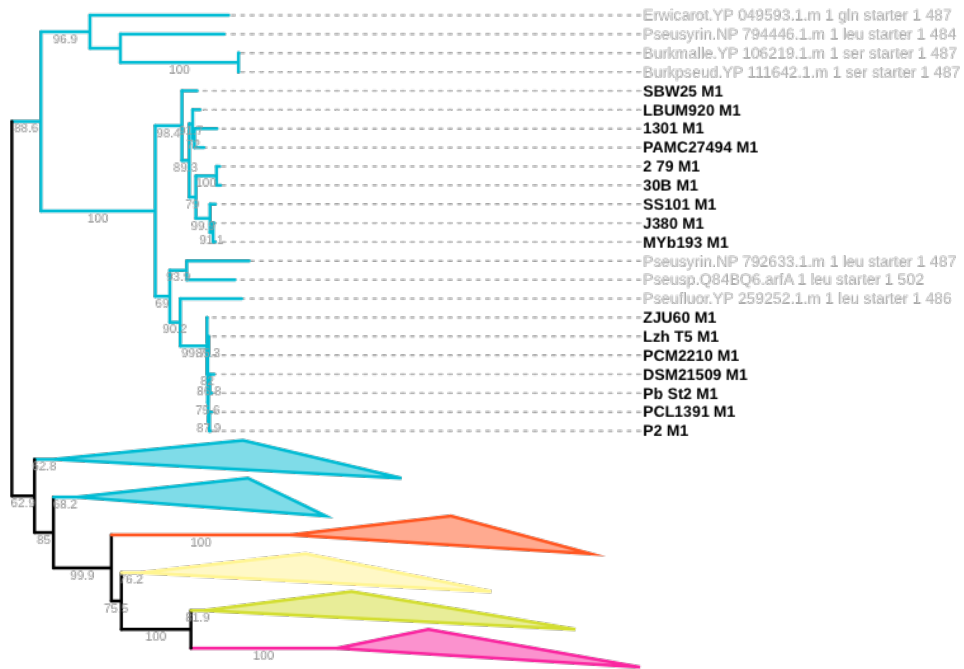

**Figure S5.** Phylogeny of condensation domains. The phylogeny was reconstructed using IQ-TREE, using the LG+F+R10 amino acid substitution model. Support values are based on 1000 bootstrap replicas. Blue: clade that comprises  $C_{\text{starter}}$  modules; orange: Cyc; yellow: LCL; green: DCL; pink:  $C_{\text{dual}}$ . The clade that comprises the condensation domains of module 1 viscosins-producers is highlighted in bold. Other clades were collapsed.

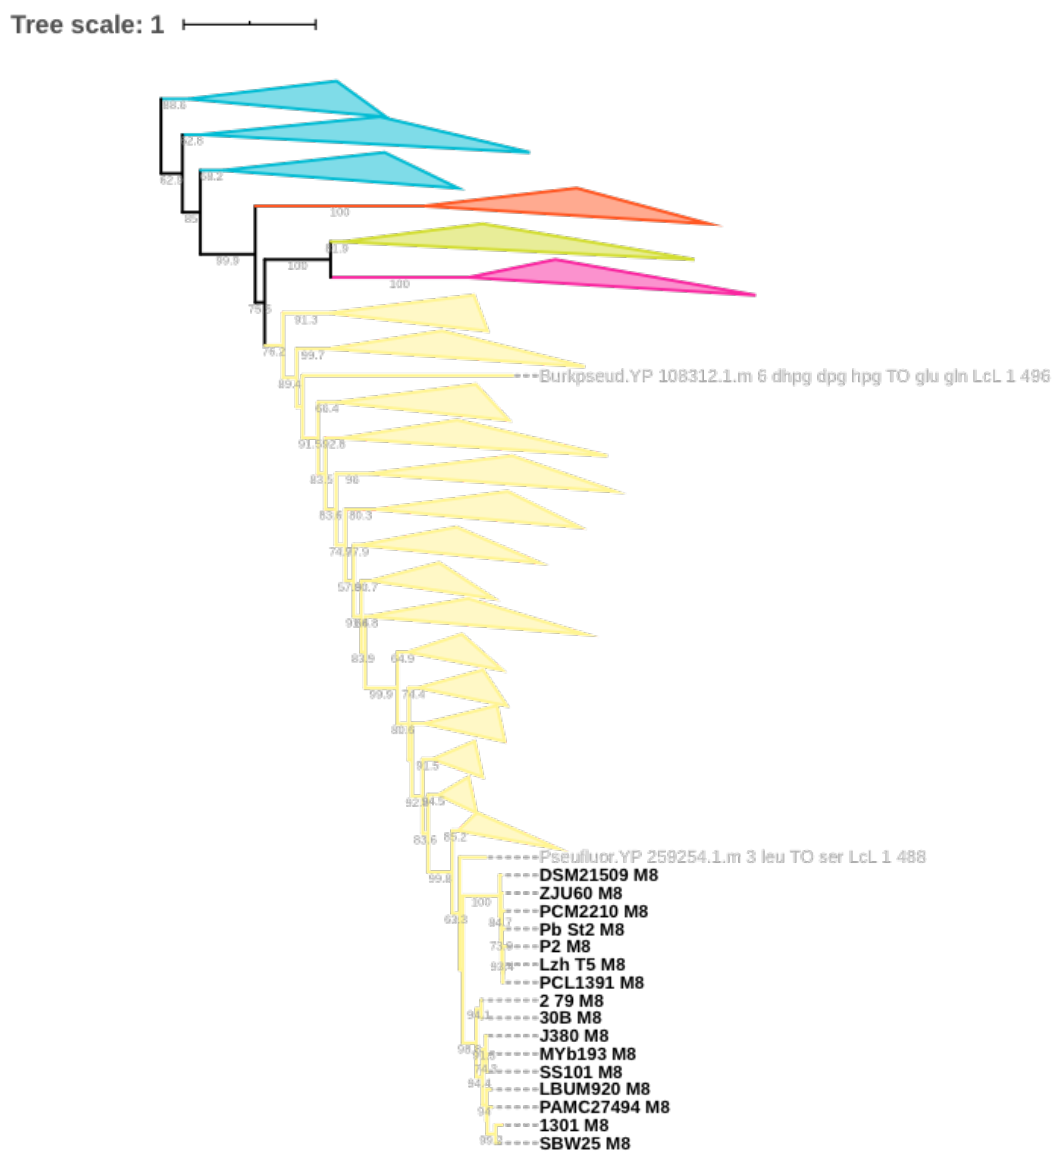

**Figure S6.** Phylogeny of condensation domains. The phylogeny was reconstructed using IQ-TREE, using the LG+F+R10 amino acid substitution model. Support values are based on 1000 bootstrap replicas. Blue: clade that comprises  $C_{\text{starter}}$  modules; orange:  $C_{\text{yc}}$ ; yellow: LCL; green: DCL; pink:  $C_{\text{dual}}$ . The clade that comprises the condensation domains of module 8 viscosins-producers is highlighted in bold. Other clades were collapsed.

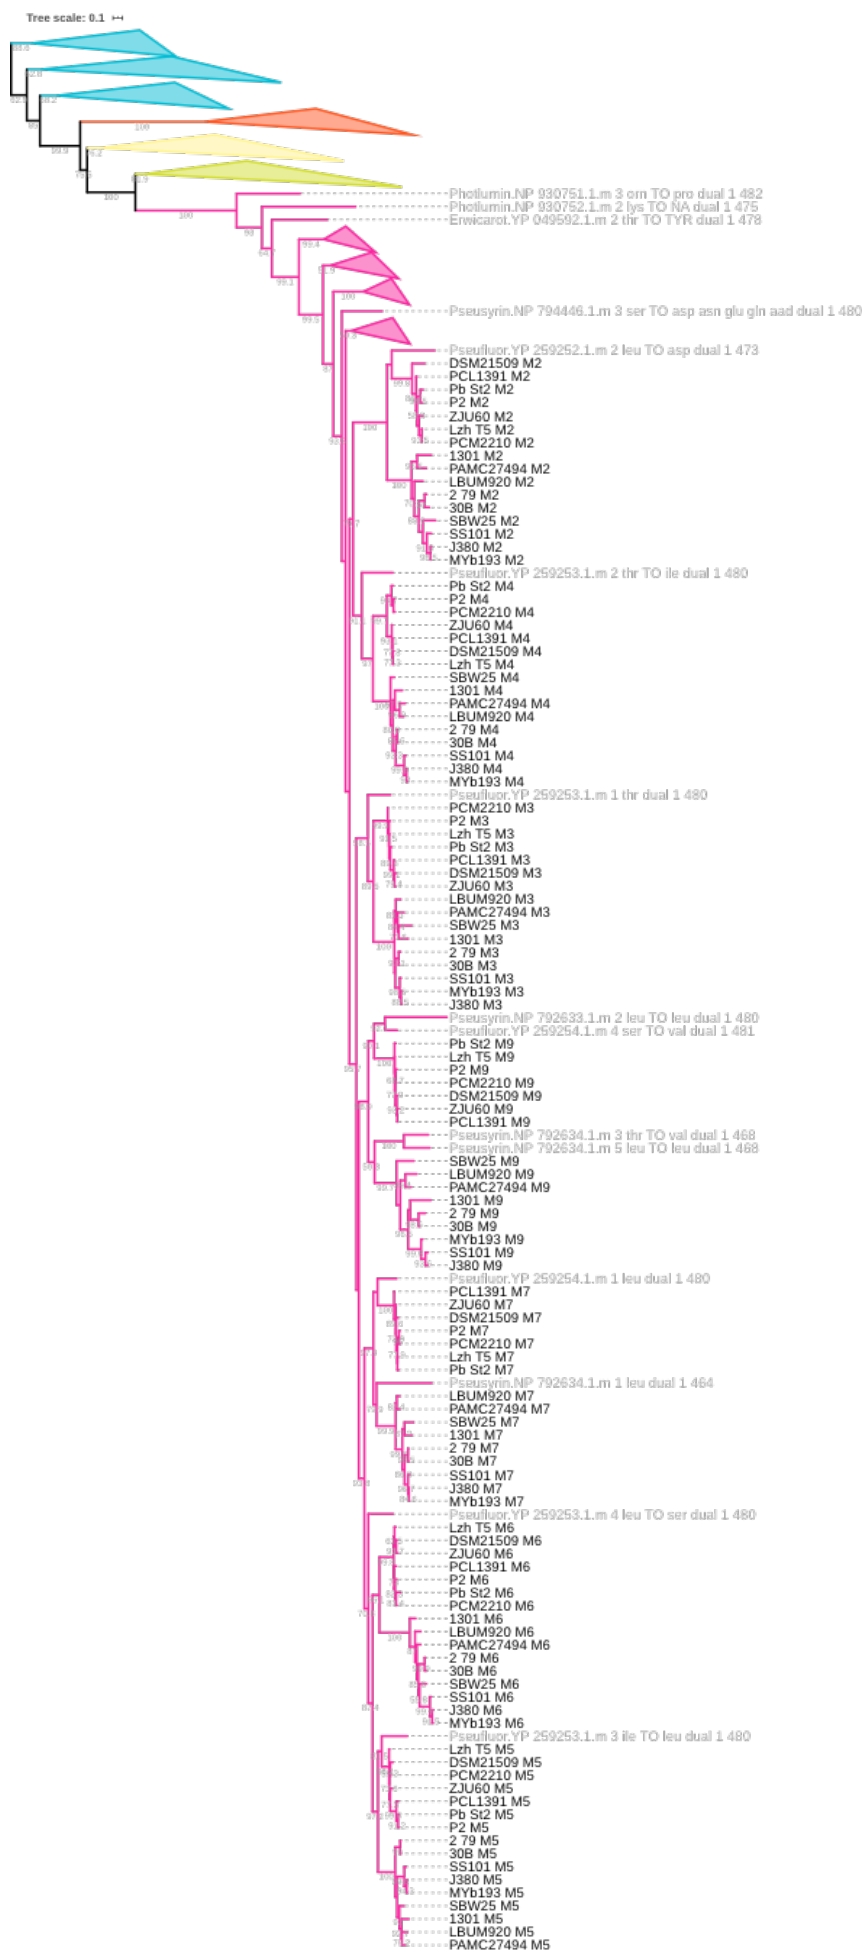



**Figure S7.** Phylogeny of condensation domains. The phylogeny was reconstructed using IQ-TREE, using the LG+F+R10 amino acid substitution model. Support values are based on 1000 bootstrap replicas. Blue: clade that comprises  $C_{\text{starter}}$  modules; orange: C<sub>yc</sub>; yellow: LCL; green: DCL; pink:  $C_{\text{dual}}$ . The clade that comprises the  $C_{\text{dual}}$  domains of viscosins-producers is highlighted in bold. Other clades were collapsed.

Tree scale: 1 

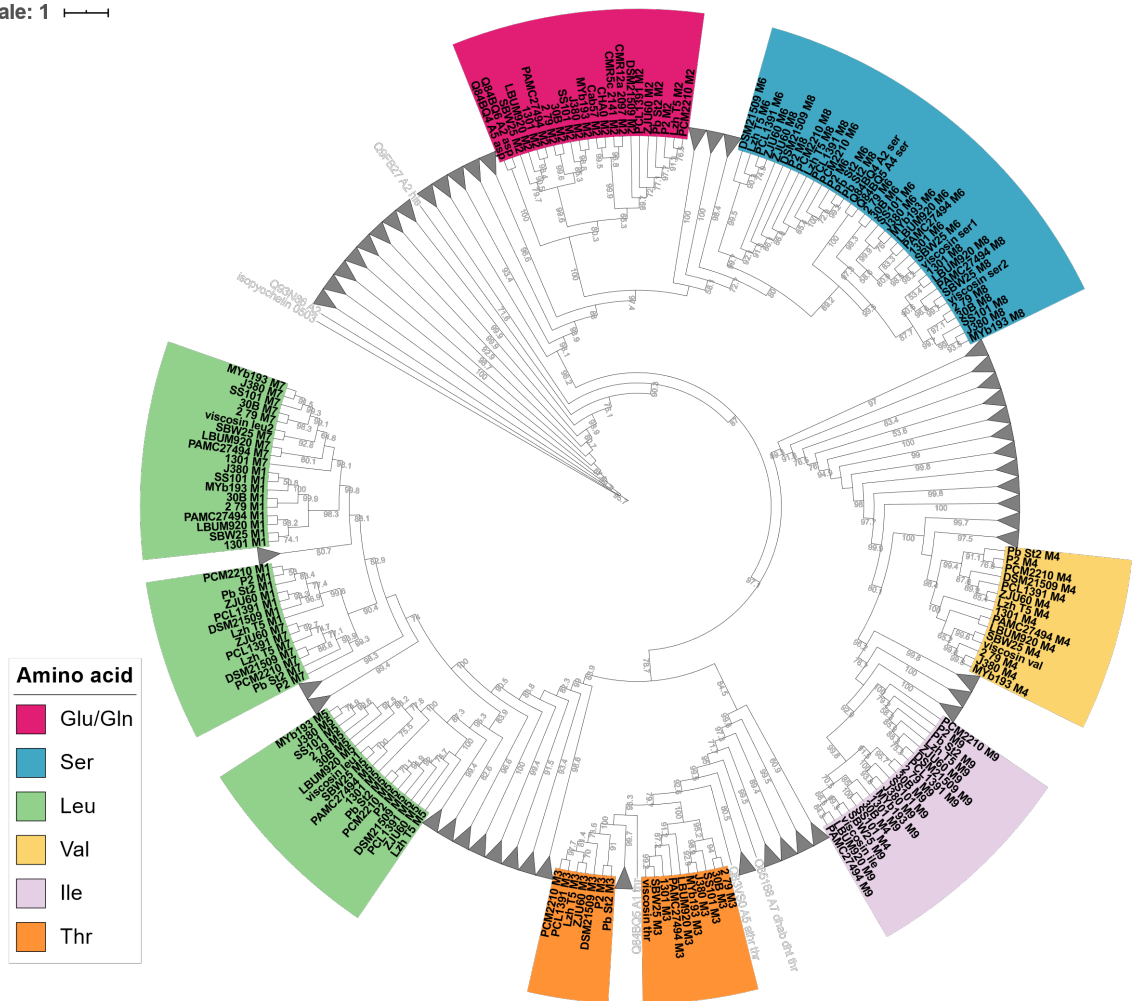

**Figure S8.** Phylogeny of adenylation domains. The phylogeny was reconstructed using IQ-TREE, using the LG+F+R10 amino acid substitution model. Support values are based on 1000 bootstrap replicas. In pink are domains responsible for recruiting Glu/Gln; in blue, Ser; in green, Leu; in yellow, Val; in lilac, Ile; in orange, Thr. Other clades were collapsed.

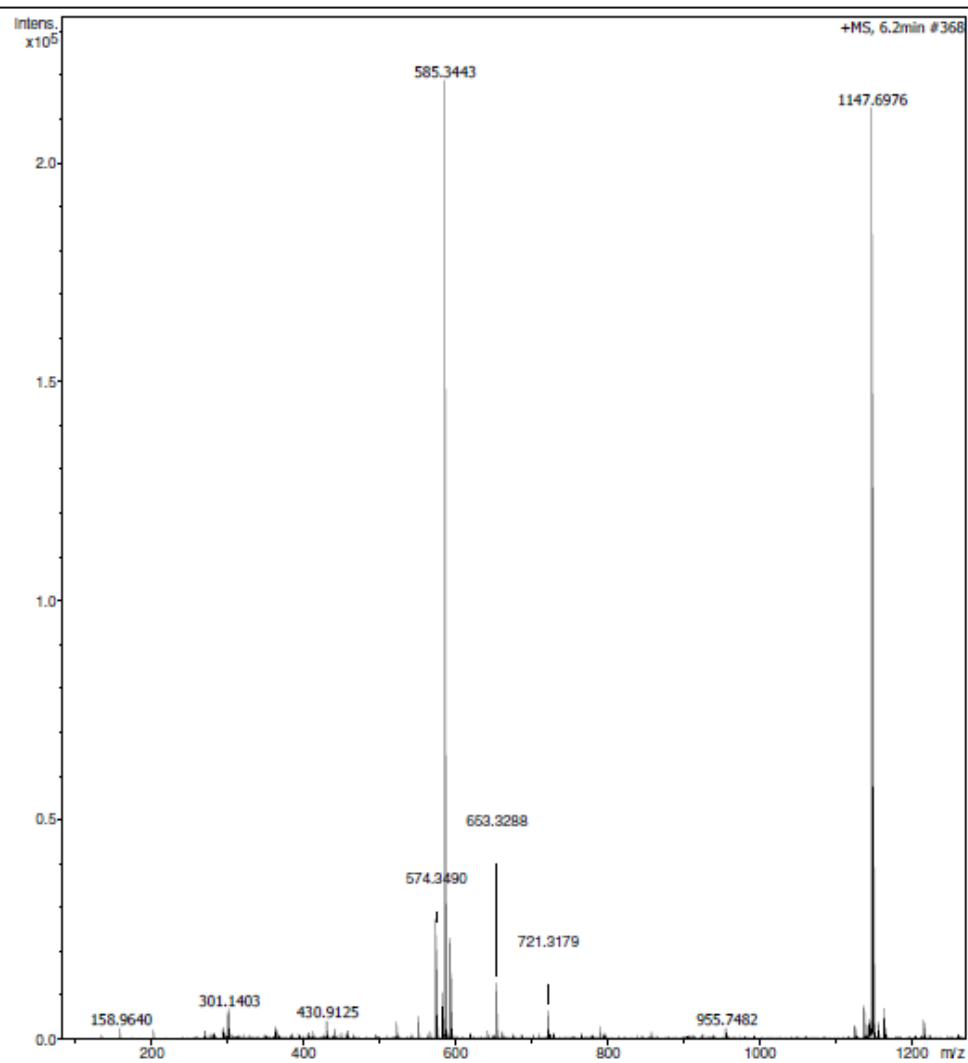

**Figure S9.** HRESI-MS spectrum of viscosinamide.

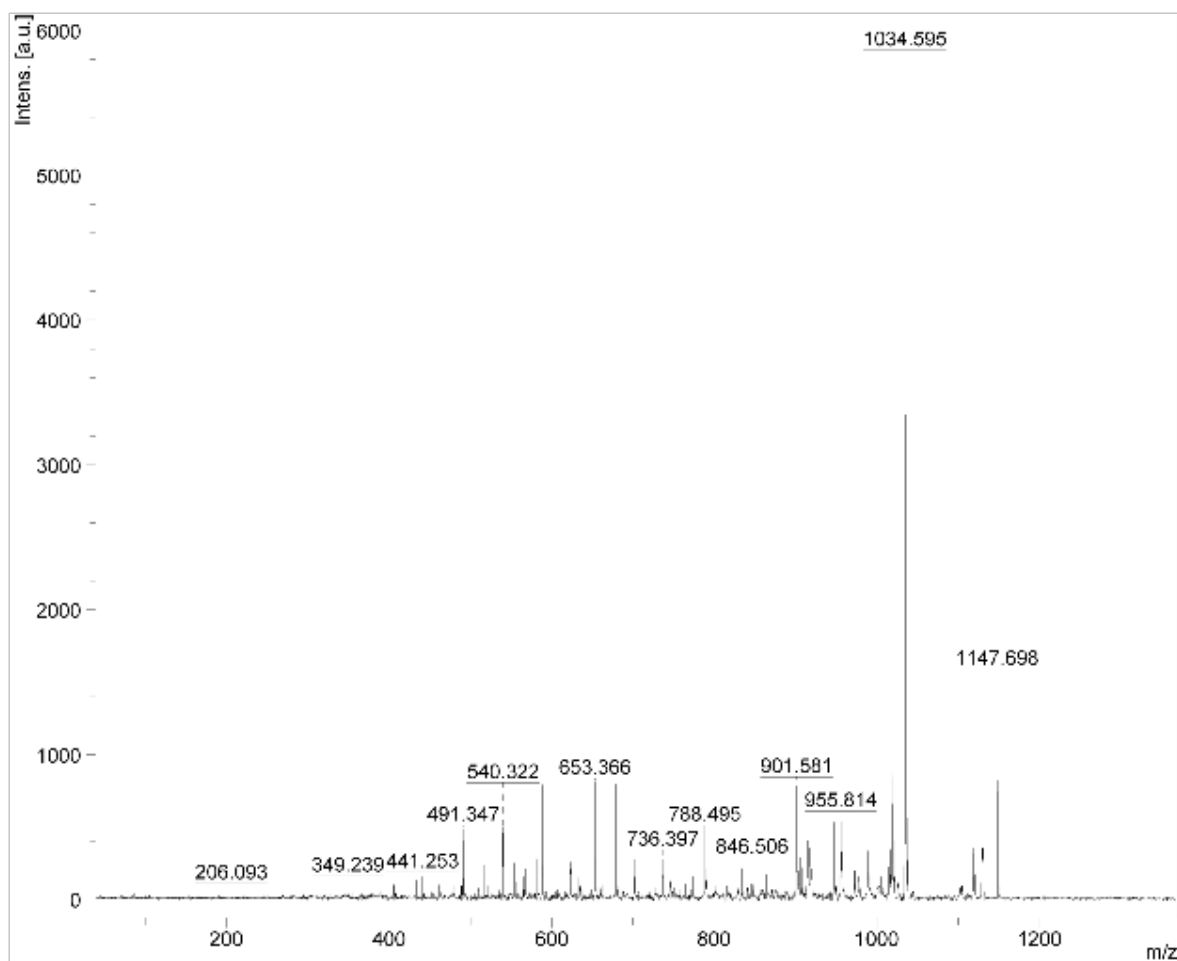

**Figure S10.** MALDI-MS/MS spectrum of viscosinamide.

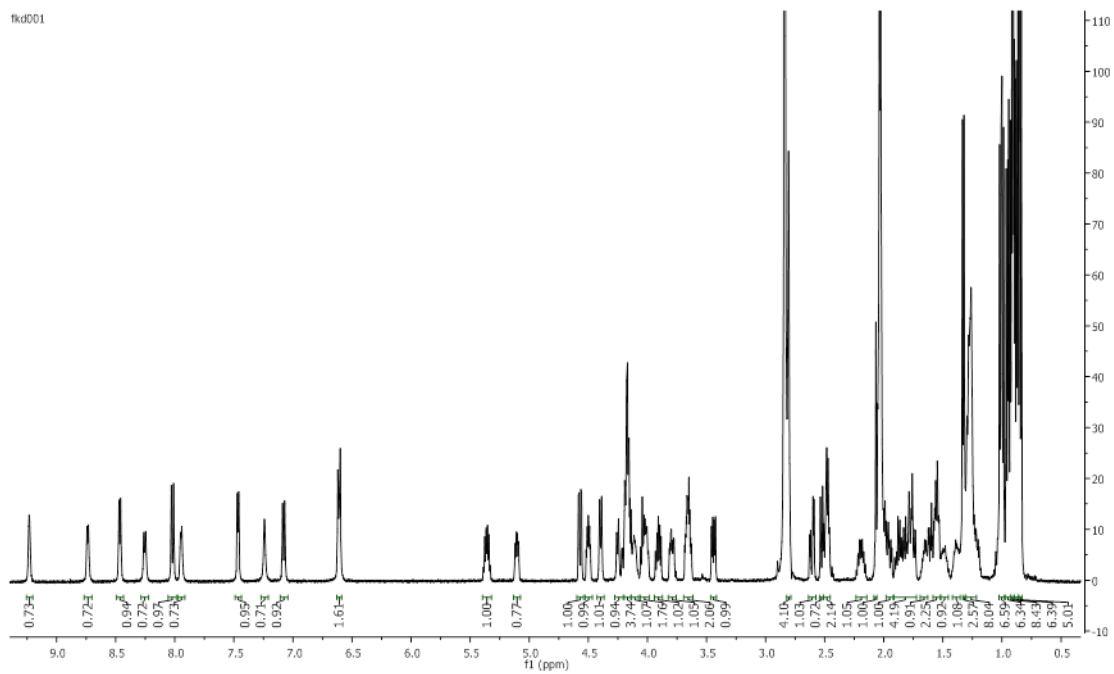

**Figure S11.**  $^1\text{H}$  NMR spectrum of viscosinamide ( $\text{CD}_3\text{COCD}_3$ , 500 MHz).

fkd001

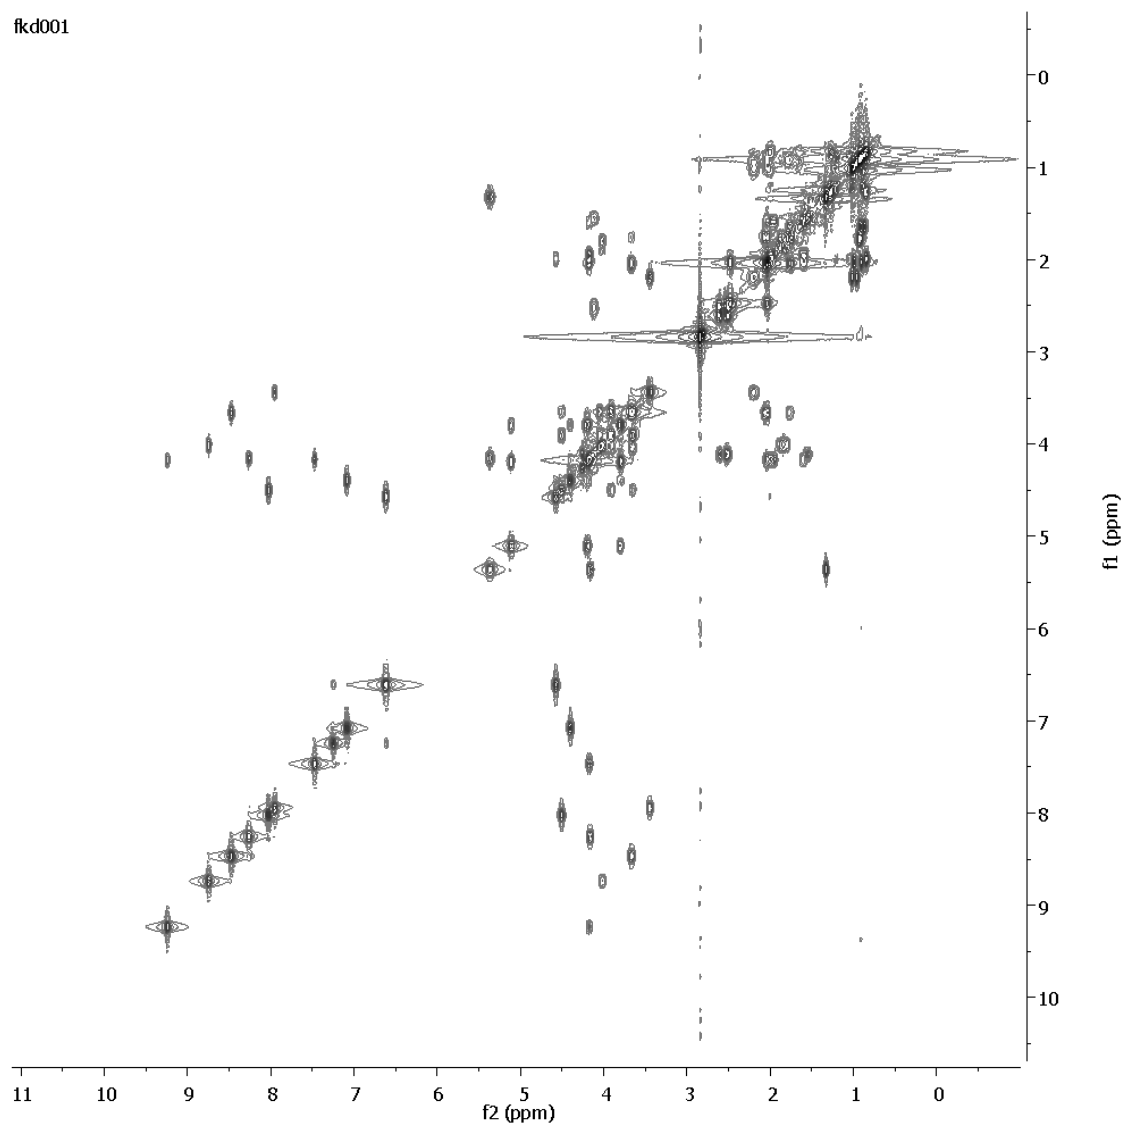

**Figure S12.**  $^1\text{H}$ ,  $^1\text{H}$ -COSY spectrum of viscosinamide ( $\text{CD}_3\text{COCD}_3$ , 500 MHz).

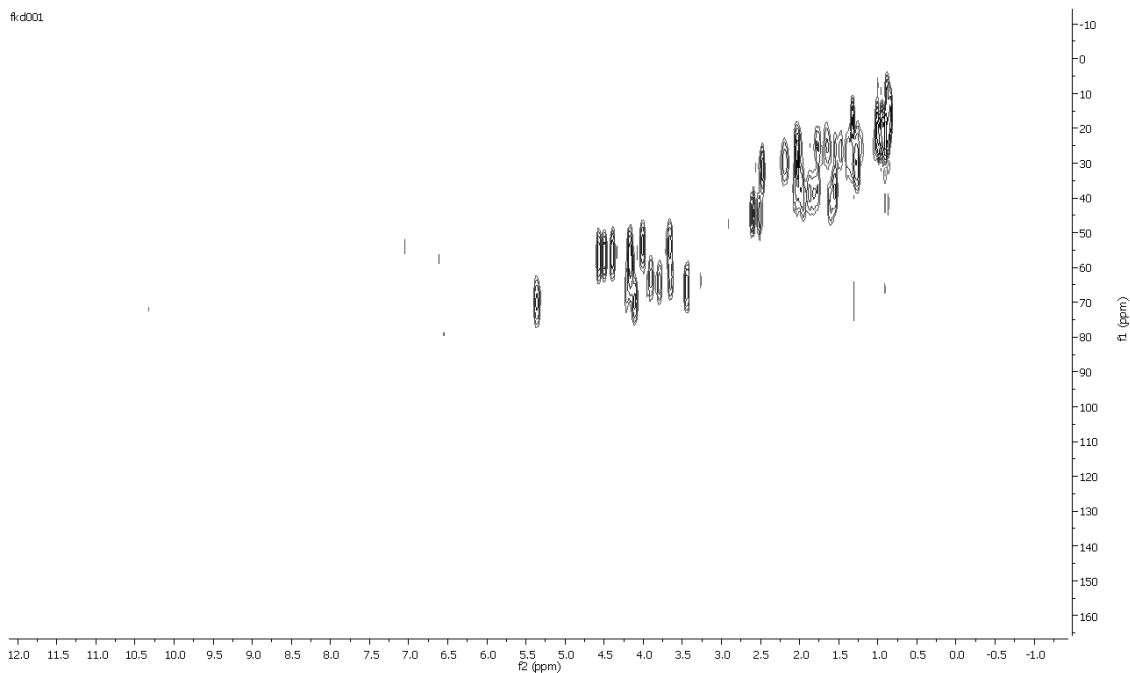

**Figure S13.** gHSQC spectrum of viscosinamide ( $\text{CD}_3\text{COCD}_3$ , 500 MHz).

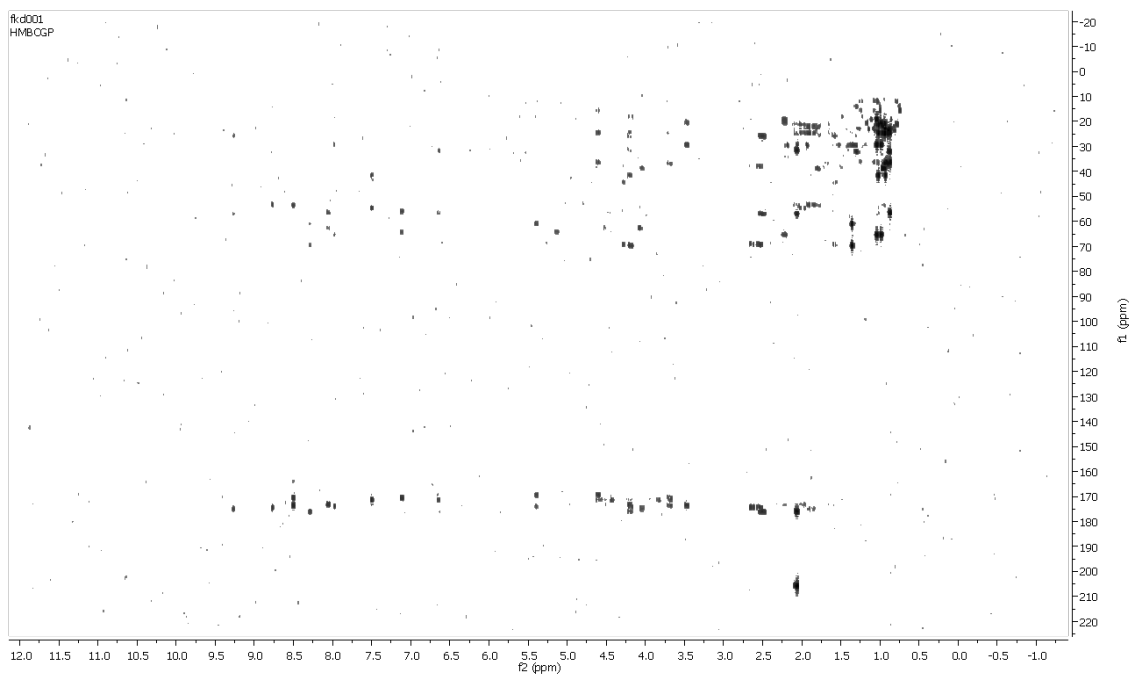

**Figure S14.** gHMBC spectrum of viscosinamide ( $\text{CD}_3\text{COCD}_3$ , 500 MHz).

**Table S1.** NMR spectroscopic data of viscosinamide (CD<sub>3</sub>COCD<sub>3</sub>).

| Amino acid | Position | $\delta$ C | $\delta$ H | Multiplicity (Hz) | COSY     | HMBC          |
|------------|----------|------------|------------|-------------------|----------|---------------|
| Fatty acid | 1        | 174.7      | --         |                   |          |               |
|            | 2        | 44.7       | 2.61       | dd (14.23; 4.04)  | 3        | 1, 3          |
|            | 3        | 69.7       | 4.11       | d (9.47)          | 3        | 1, 3, 4, 5    |
|            | 4        | 38.3       | 1.55       | m                 | 4        |               |
|            | 5        | 26.3       | 1.48       | m                 | 5        |               |
|            | 6        | n.a.       | n.a.       |                   |          |               |
|            | 7        | n.a.       | n.a.       |                   |          |               |
|            | 8        | n.a.       | n.a.       |                   |          |               |
|            | 9        | n.a.       | n.a.       |                   |          |               |
|            | 10       | n.a.       | n.a.       |                   |          |               |
|            | 11       | n.a.       | n.a.       |                   |          |               |
| Leu1*      | 12       |            | 8.74       | d (5.88)          | 13       | 13, 14        |
|            | 13       | 53.4       | 3.99       | m                 | 12, 15   | 15,14         |
|            | 14       | 174.9      | --         |                   |          |               |
|            | 15       | 38.9       | 1.87       | m                 | 13, 16   | 16, 17, 13,   |
|            | 16       | 25.3       | 1.77       | m                 | 15, 17   | 13, 17        |
|            | 17       | 22.3       | 0.91       | m                 | 16       | 16, 13        |
|            | 18       | 21.3       | 0.91       | m                 | 16       | 16, 13        |
| Gln2       | 19       | --         | 8.25       | d (7.10)          | 20       | 20            |
|            | 20       | 58.3       | 4.15       | m                 | 22       | 23, 21,       |
|            | 21       | 176.6      | --         |                   |          |               |
|            | 22       | 28.7       | 2.02       | m                 | 20, 23   | 23,20,24      |
|            | 23       | 31.7       | 2.48       | dt (11.10; 5.92)  | 22       | 24, 20,       |
|            | 24       | 176.5      | --         |                   |          |               |
|            | 25       | --         | 7.24/6.61  | s                 |          |               |
| Thr3       | 26       |            | 9.23       | br s              | 27       | 27, 28        |
|            | 27       | 57.0       | 4.17       | m                 | 29       | 28, 21,30, 29 |
|            | 28       | 174.5      | --         |                   |          |               |
|            | 29       | 71         | 5.36       | dq (12.00; 5.89)  | 27, 30   | 28, 63        |
|            | 30       | 17.9       | 1.32       | d (6.00)          | 29       |               |
| Val4       | 31       | --         | 7.95       | d (5.21)          | 32       | 32, 34, 33    |
|            | 32       | 65.8       | 3.44       | dd (11.08; 5.63)  | 34       | 35, 34,       |
|            | 33       | 174.1      | --         |                   |          |               |
|            | 34       | 29.7       | 2.19       | m                 | 35,36    | 33,35, 32     |
|            | 35       | 20.3       | 1.01       | m                 | 34       | 36            |
|            | 36       | 19.5       | 0.96       | m                 | 34       | 35,34,32      |
|            | Leu5*    | 37         | --         | 8.47              | d (6.75) | 38            |
| 38         |          | 54         | 3.67       | m                 | 40       | 41, 39, 33    |
| 39         |          | 171.1      | --         |                   |          |               |
| 40         |          | 38.8       | 1.77       | m                 | 38,41    | 38, 40, 43    |
| 41         |          | 25.6       | 1.62       | m                 | 42,43    | 43            |
| 42         |          | 21.3       | 0.92       | m                 | 41       | 43, 41        |
| 43         |          | 21.8       | 0.94       | m                 | 41       | 41, 40        |
| Ser6       |          | 44         | --         | 07.08             | d (5.69) | 45            |
|            | 45       | 56.4       | 4.4        | m                 | 44,47    | 46,47         |
|            | 46       | 171.9      | --         |                   |          |               |
|            | 47       | 64.5       | 3.79       | m                 | 45,48    | 46            |
|            | 48       | --         | 5.11       | dd (8.98; 5.59)   | 47       | 47            |
| Leu7*      | 49       | --         | 7.47       | d (8.45)          | 50       | 46, 52        |
|            | 50       | 56.2       | 4.16       | dt (8.42; 2.43)   | 49       | 52, 51, 46    |

|      |    |       |      |                  |            |                    |
|------|----|-------|------|------------------|------------|--------------------|
|      | 51 | 173.6 | --   |                  |            |                    |
|      | 52 | 41.6  | 1.60 | m                | 53         | 50                 |
|      | 53 | 36.1  | 1.98 | m                |            | 50, 51             |
|      | 54 | 16    | 0.84 | m                |            | 50                 |
|      | 55 | 16    | 0.85 | m                |            | 50                 |
| Ser8 | 56 | --    | 8.02 | d (9.14)         | 57         | 57, 51, 59         |
|      | 57 | 56.7  | 4.50 | dt (8.88; 4.45)  | 56, 59     | 59, 58, 51         |
|      | 58 | 171.7 | --   |                  |            |                    |
|      | 59 | 62.4  | 3.65 | m                | 60, 57     | 58                 |
|      | 60 | --    | 4.04 | m                | 59         | 59                 |
| Ile9 | 61 | --    | 6.61 | d (9.99)         | 62         | 62, 58, 63         |
|      | 62 | 56.7  | 4.57 | dd (10.15; 3.03) | 61, 64     | 64, 65, 66, 63, 58 |
|      | 63 | 170.1 | --   |                  |            |                    |
|      | 64 | 36.1  | 1.98 | m                | 62, 65, 66 | 66, 67             |
|      | 65 | 16    | 0.85 | m                | 64         | 64, 66, 67, 62     |
|      | 66 | 25.1  | 1.6  | m                | 67, 64     | 62                 |
|      | 67 | 21.3  | 0.94 | m                | 66         | 66                 |

\* Interchangeable.

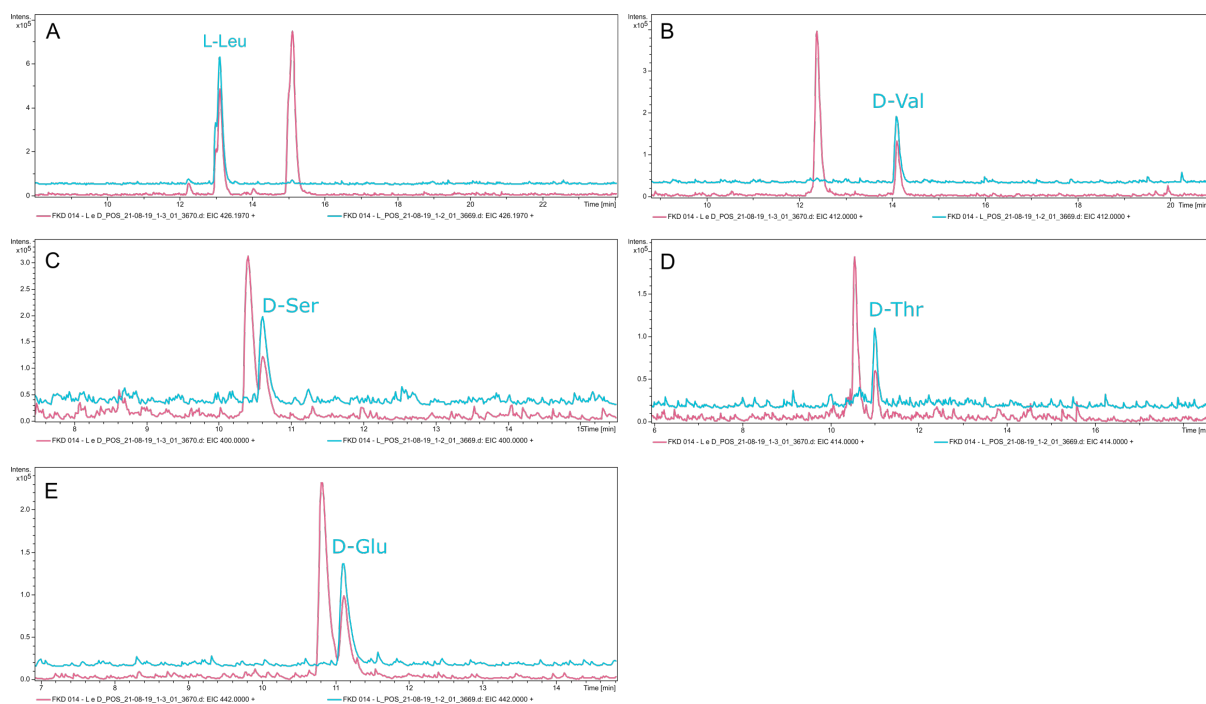

**Figure S15.** Chromatograms of viscosinamide products after hydrolysis and advanced Marfey derivatization. In blue, the chromatograms of the product of the reaction with L-FDLA are represented, and in pink, with L, D-FDLA. (A) EIC *m/z* 426.45, corresponding to L-Leu. (B) EIC *m/z* 412.43, corresponding to D-Val. (C) EIC *m/z* 400.37, corresponding to D-Ser. (D) EIC *m/z* 414.4, corresponding to D-Thr. (E) EIC *m/z* 442.41, corresponding to D-Glu.



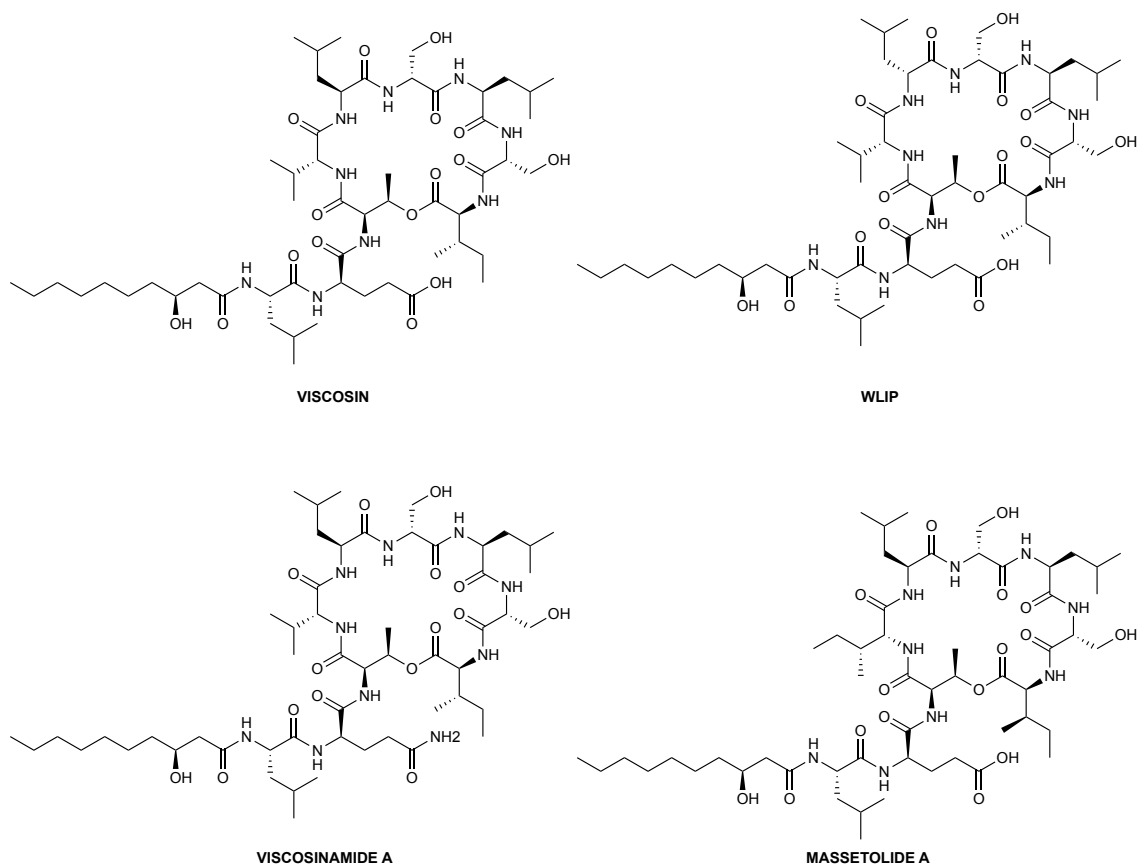

**Figure S16.** Chemical structures of viscosin, WLIP, viscosinamide A and massetolide A.
